# Supplementary material for: LDH-derived Co0.5Ni0.5Te2 dispersed in 3D carbon sheets as a separator modifier to enable kinetics-accelerated lithium–sulfur batteries
Source: Royal Society of Chemistry journal article supplement (doi:10.1039/d4dt02619e), 2024-11-06
Supplement: d4dt02619e1.pdf [file d4dt02619e1.pdf]

## Supporting Information

### LDH-derived $\text{Co}_{0.5}\text{Ni}_{0.5}\text{Te}_2$ Dispersed in 3D Carbon Sheets as Separator Modifier to Enable Kinetics-Accelerated Lithium-Sulfur Batteries

Chunmei Li,<sup>a,b</sup> Kan Mi,<sup>\*a,b</sup> Kai Xu,<sup>a</sup> Zhuo Jia,<sup>a</sup> Xiaolei Jiang,<sup>a,b</sup> Huili Peng,<sup>a,b</sup> Xiuwen Zheng<sup>\*b,c</sup> and  
Hongjiao Nie<sup>\*a,b</sup>

<sup>a</sup> School of Chemistry and Chemical Engineering, Linyi University, Linyi, 276000, China

E-mail: mikan@lyu.edu.cn, niehongjiao@lyu.edu.cn

<sup>b</sup> Key Laboratory of Advanced Biomaterials and Nanomedicine in Universities of Shandong, Linyi University,  
Linyi 276000, PR China

<sup>c</sup> Qilu Normal University, Jinan, 250013, P. R. China

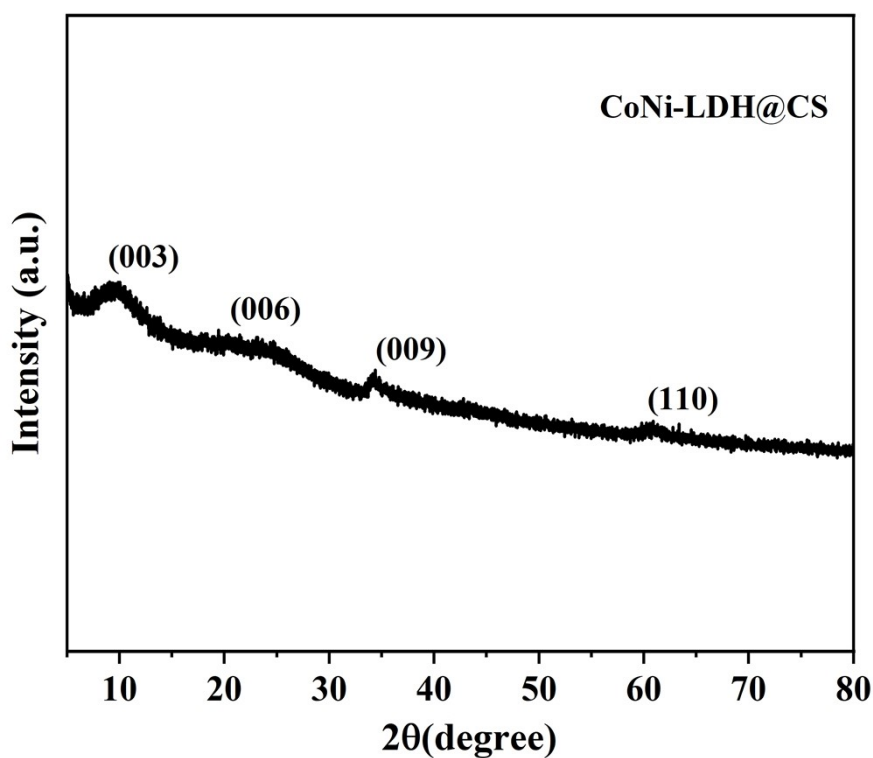

Fig. S1 The XRD pattern of CoNi-LDH@CS.

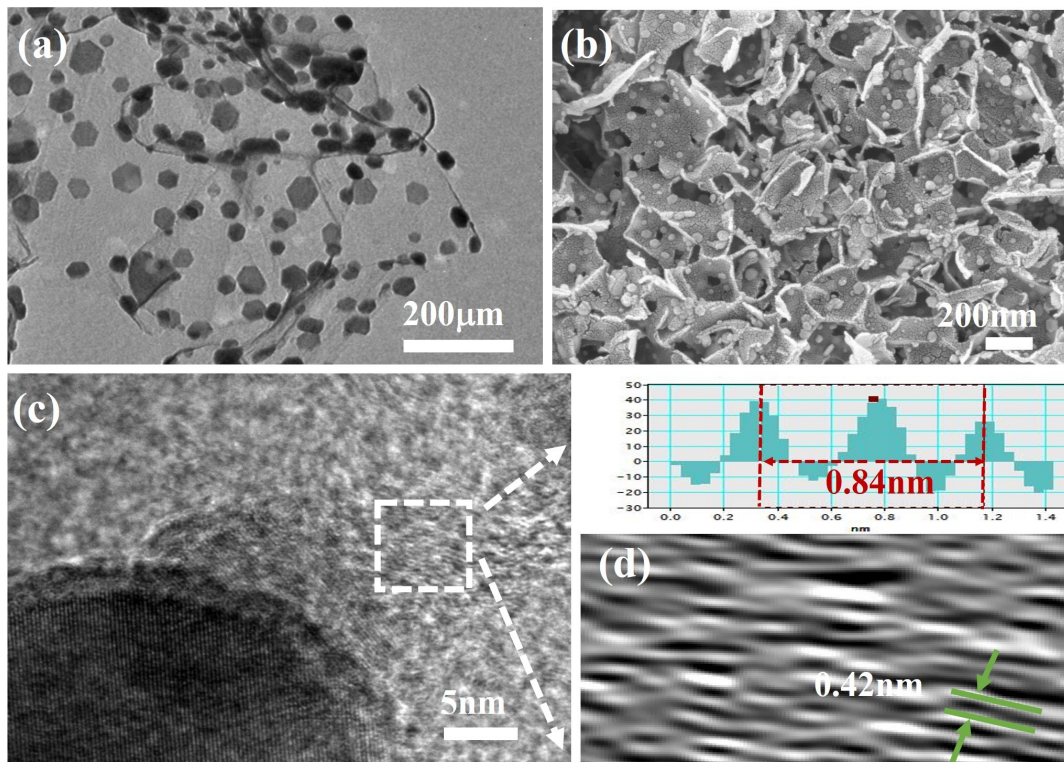

**Fig. S2** (a-b) TEM and SEM images of  $\text{Co}_{0.5}\text{Ni}_{0.5}\text{Te}_2@\text{CS}$ . (c-d) HRTEM image of  $\text{Co}_{0.5}\text{Ni}_{0.5}\text{Te}_2@\text{CS}$  and lattice fringes of CS.

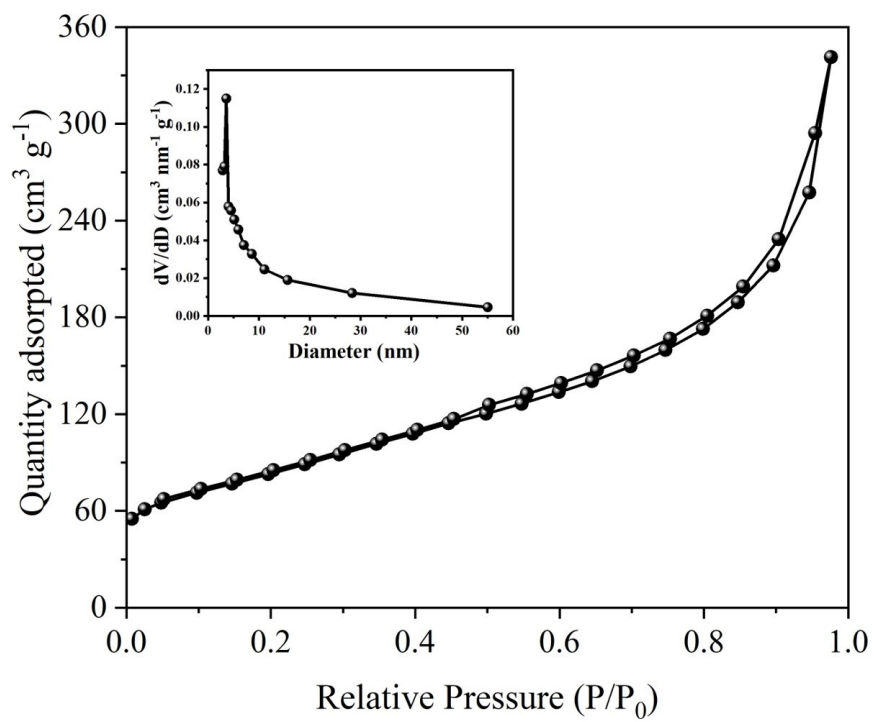

**Fig. S3** N<sub>2</sub> adsorption-desorption isotherm and pore size distribution (inset) of CS.

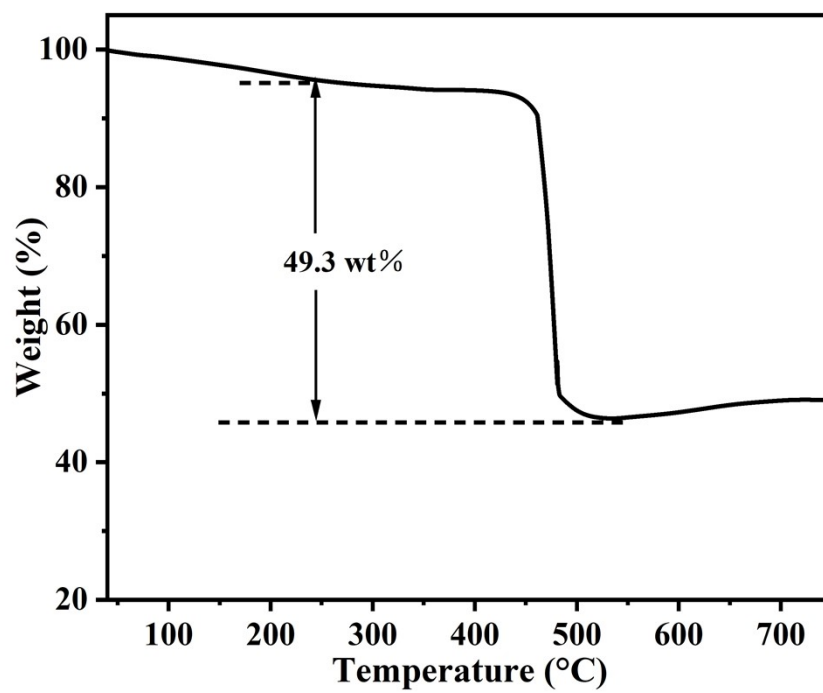

**Fig. S4** TGA curve of Co<sub>0.5</sub>Ni<sub>0.5</sub>Te<sub>2</sub>@CS.

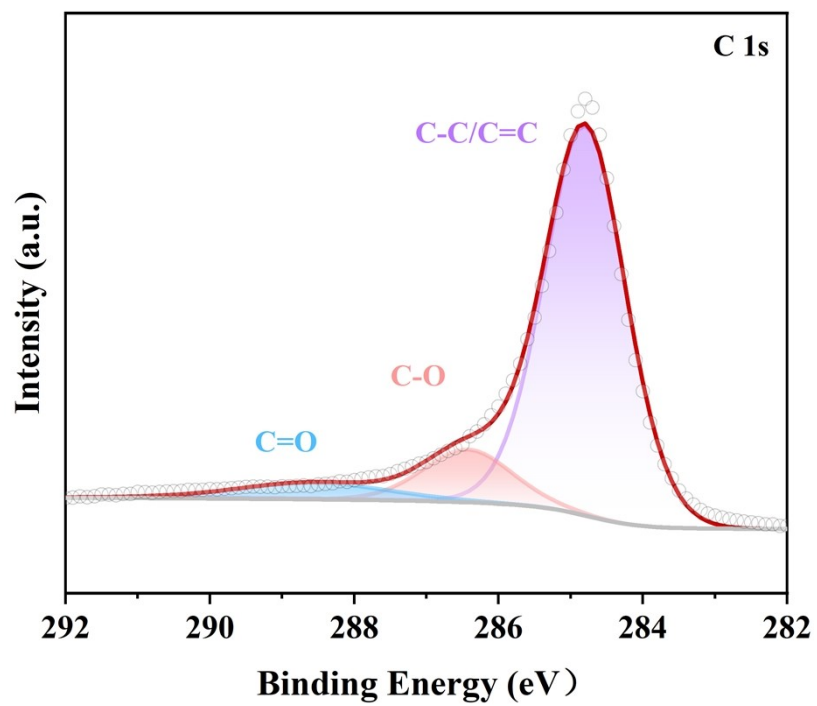

Fig. S5 XPS spectra of C1s.

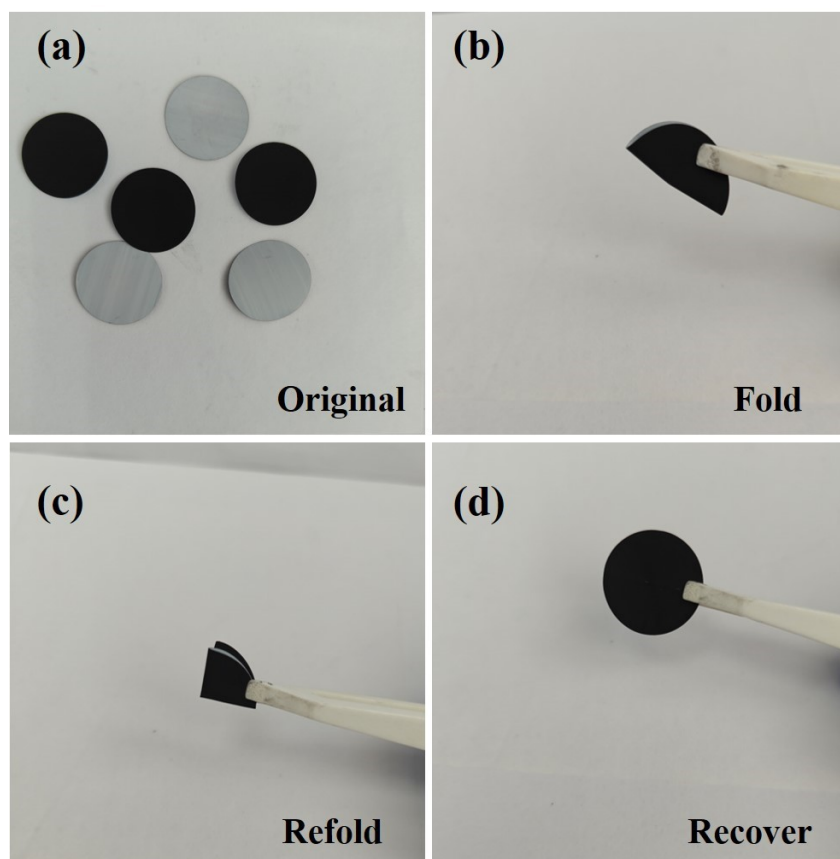

**Fig. S6** The visual pictures of modified separator with  $\text{Co}_{0.5}\text{Ni}_{0.5}\text{Te}_2@\text{CS}$  as coating layer (a) the original state, (b-c) folding and refolding state, (d) recovering state.

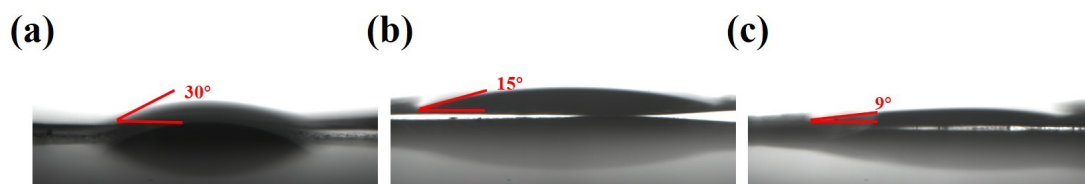

**Fig. S7** The contact angles between electrolyte and (a) PP, (b) CS/PP and (c)  $\text{Co}_{0.5}\text{Ni}_{0.5}\text{Te}_2@\text{CS/PP}$ .

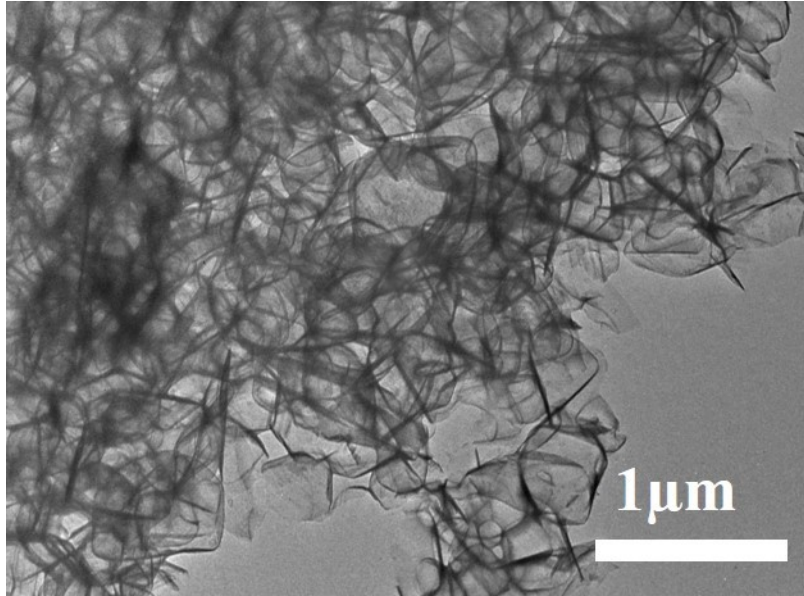

**Fig. S8** TEM images of NPCS



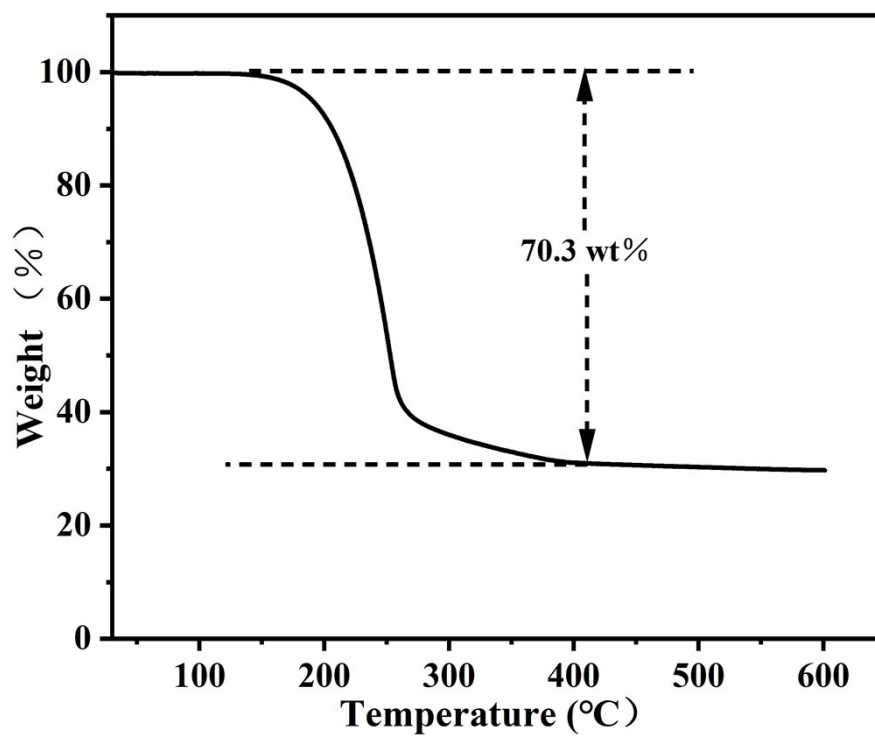

**Fig. S9** TGA curve of S/NPCS.

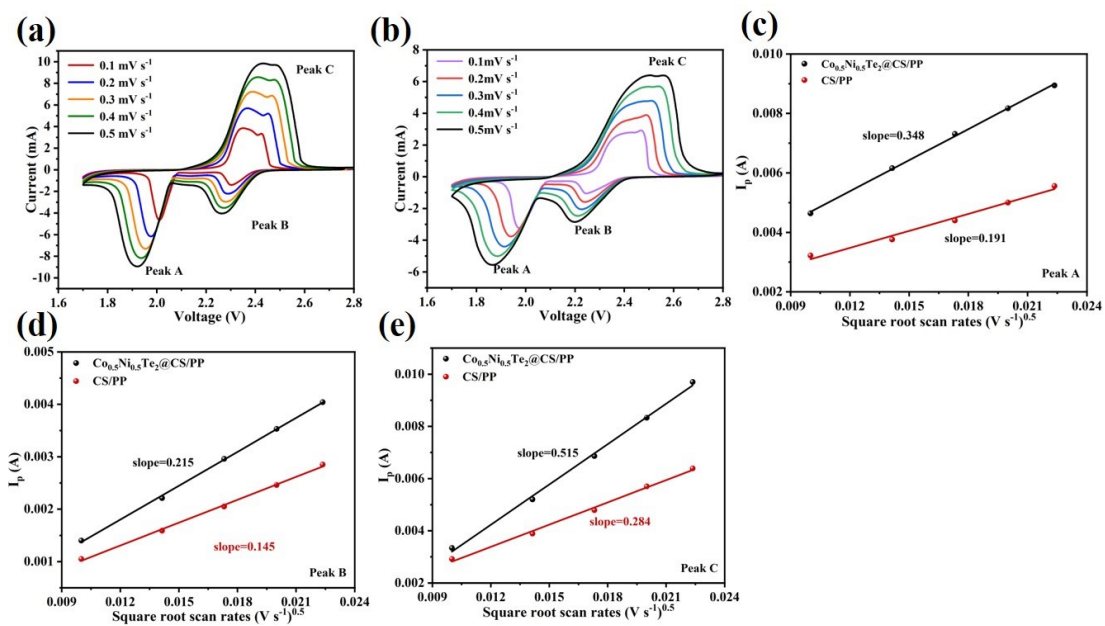

**Fig. S10** CV profiles of cell with  $\text{Co}_{0.5}\text{Ni}_{0.5}\text{Te}_2@\text{CS/PP}$  (a) and  $\text{CS/PP}$  (b) at various scan rates of 0.1-0.5  $\text{mV s}^{-1}$  and (c-e) the linear fitting curves of  $I_p$ - $v^{0.5}$  at peak A, B and C for cells with  $\text{Co}_{0.5}\text{Ni}_{0.5}\text{Te}_2@\text{CS/PP}$  and  $\text{CS/PP}$ .

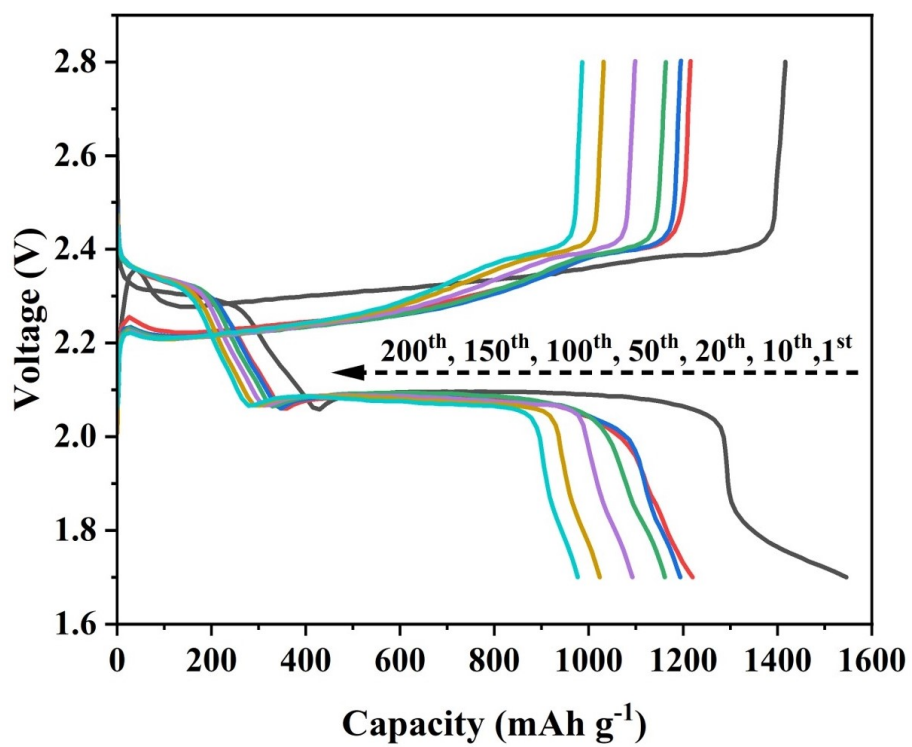

**Fig. S11** The galvanostatic charge/discharge profiles of S//Co<sub>0.5</sub>Ni<sub>0.5</sub>Te<sub>2</sub>@CS/PP with different cycles at 0.5 C.

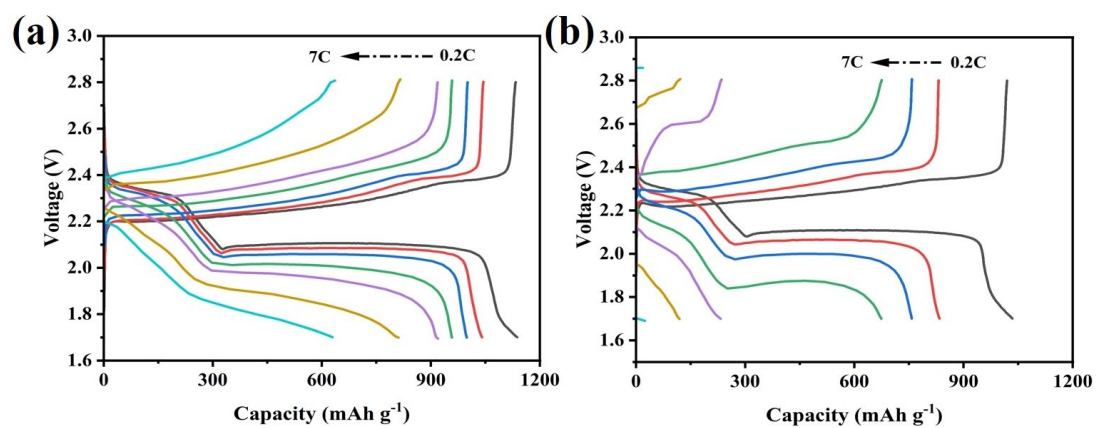

**Fig. S12** The discharge-charge profiles at various rates ranged from 0.2 to 7 C:

(a) S//CS/PP and (b) S//PP.

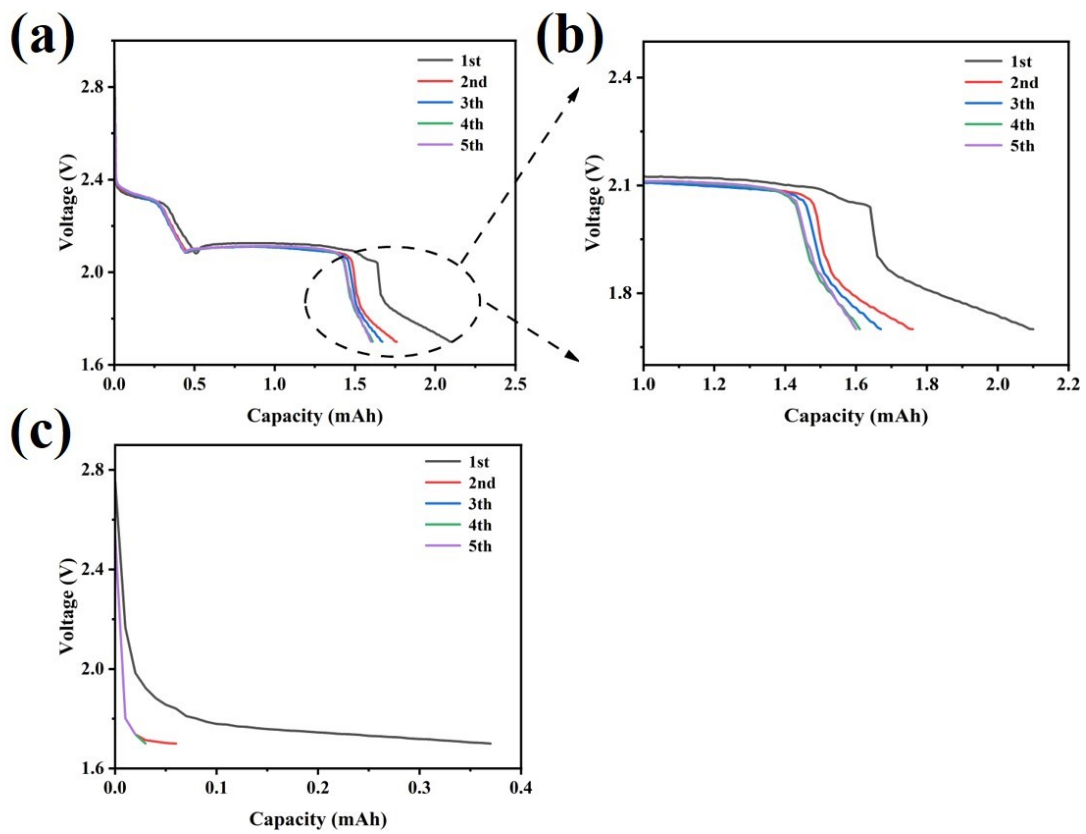

**Fig. S13** (a-b) The voltage profiles of the cell with S//Co<sub>0.5</sub>Ni<sub>0.5</sub>Te<sub>2</sub>@CS/PP at 0.2 C. (c) the voltage profiles of blank aluminum foil as electrode with Co<sub>0.5</sub>Ni<sub>0.5</sub>Te<sub>2</sub>@CS/PP at 350 mA.

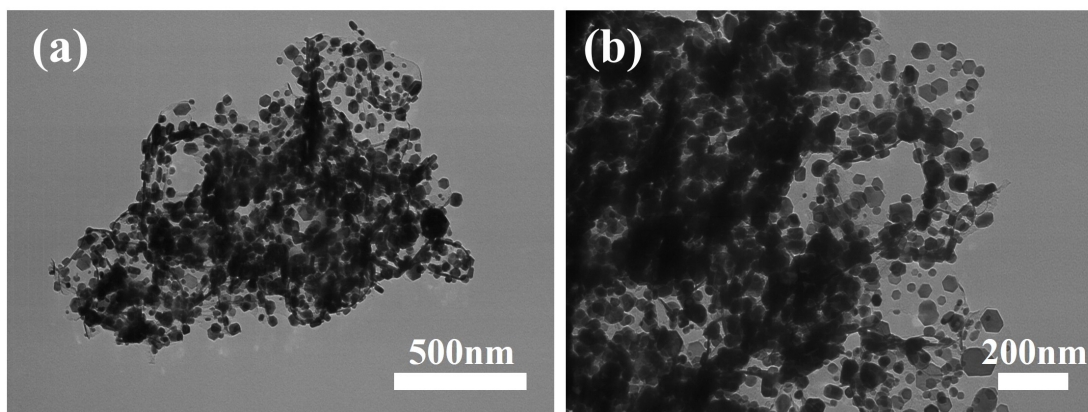

**Fig. S14** TEM images of M-Co<sub>0.5</sub>Ni<sub>0.5</sub>Te<sub>2</sub>@CS.

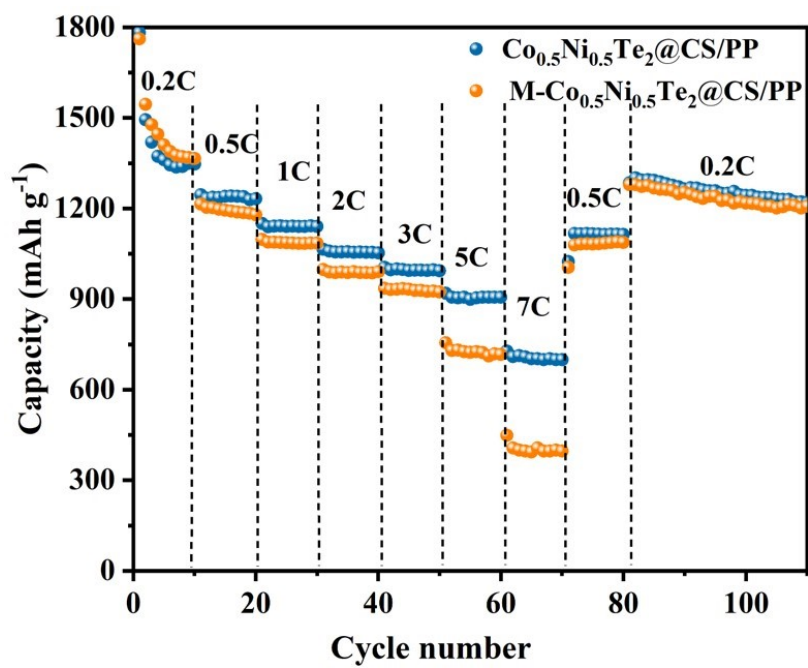

**Fig. S15** the comparison of rate performance of cells with  $\text{Co}_{0.5}\text{Ni}_{0.5}\text{Te}_2@\text{CS}/\text{PP}$  and  $\text{M-Co}_{0.5}\text{Ni}_{0.5}\text{Te}_2@\text{CS}/\text{PP}$

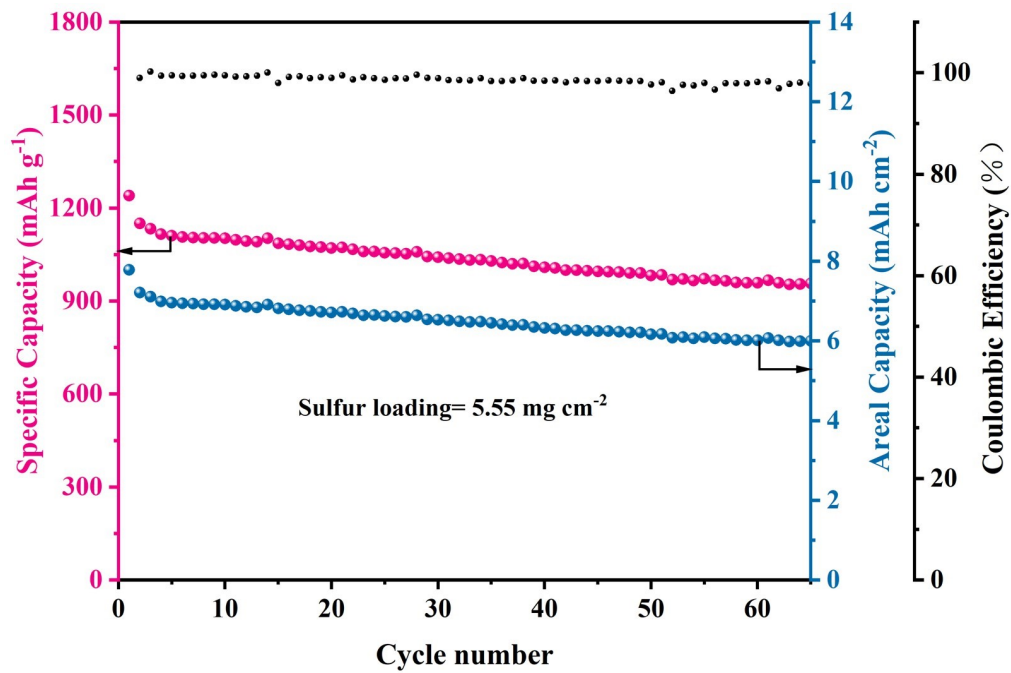

**Fig. S16** The cycling stability of S//Co<sub>0.5</sub>Ni<sub>0.5</sub>Te<sub>2</sub>@CS/PP with sulfur loading of 5.55 mg cm<sup>-2</sup>.



**Table S1.** The values of Q1, Q2 and the ratios of Q2/Q1

|                                                            | Q1 ( mAh g <sup>-1</sup> ) | Q2 ( mAh g <sup>-1</sup> ) | Q2/Q1 |
|------------------------------------------------------------|----------------------------|----------------------------|-------|
| PP                                                         | 306                        | 663                        | 2.16  |
| CS/PP                                                      | 323                        | 737                        | 2.28  |
| Co <sub>0.5</sub> Ni <sub>0.5</sub> Te <sub>2</sub> @CS/PP | 360                        | 934                        | 2.59  |

**Table S2.** Comparison of Li-S battery performance assembled with different modified separators.

| Separator Modifier                                             | Loading (mg cm <sup>-2</sup> ) | C Rate     | Cycle number | Capacity Retention (mAh g <sup>-1</sup> ) | Ref              |
|----------------------------------------------------------------|--------------------------------|------------|--------------|-------------------------------------------|------------------|
| SV-VS <sub>2</sub>                                             | 0.50                           | 0.2        | 150          | 921                                       | [1]              |
| NSPCF@CoS <sub>2</sub>                                         | 0.98                           | 0.5        | 100          | 665                                       | [2]              |
| Oxygen-doped carbon/rGO                                        | 0.50                           | 0.1        | 200          | 830                                       | [3]              |
| Ta <sub>4</sub> C <sub>3</sub> -Ta <sub>2</sub> O <sub>5</sub> | 0.81                           | 1          | 500          | 457.1                                     | [4]              |
| TiB <sub>2</sub> @Graphene                                     | 0.88                           | 0.5        | 300          | 850                                       | [5]              |
| Fe <sub>3</sub> O <sub>4</sub> /RGO                            | 0.60                           | 0.3        | 200          | 563                                       | [6]              |
| Local 3D Co <sub>3</sub> O <sub>4</sub>                        | 0.43                           | 2          | 300          | 548                                       | [7]              |
| NiCo <sub>2</sub> O <sub>4</sub> /CNF                          | 2.00                           | 2          | 500          | 658                                       | [8]              |
| Ni/PCMS                                                        | 0.32                           | 0.5        | 200          | 623.5                                     | [9]              |
| Ni/NiO-C                                                       | 0.54                           | 1          | 500          | 484                                       | [10]             |
| CoN@NCNT                                                       | 0.54                           | 0.2        | 200          | 729.7                                     | [11]             |
| PC/MWCNT                                                       | 0.51                           | 0.5        | 200          | 659                                       | [12]             |
| $\alpha$ -MnO <sub>2</sub> @CNT                                | 0.60                           | 0.2        | 100          | 941                                       | [13]             |
| TiO <sub>2</sub> @SCNT                                         | 0.34                           | 0.5        | 200          | 848                                       | [14]             |
| Co@N-CNTs                                                      | 0.64                           | 1          | 500          | 610                                       | [15]             |
| NbN@NC                                                         | 0.30                           | 2          | 400          | 780.6                                     | [16]             |
| <b>Co<sub>0.5</sub>Ni<sub>0.5</sub>Te<sub>2</sub>@CS/PP</b>    | <b>0.43</b>                    | <b>0.5</b> | <b>200</b>   | <b>976.3</b>                              | <b>This work</b> |
|                                                                |                                | <b>2</b>   | <b>500</b>   | <b>784.8</b>                              |                  |

## References

1. L. He, X. Zhang, D. Yang, J. Li, M. Wang, S. Liu, J. Qiu, T. Ma, J. Ba, Y. Wang and Y. Wei, *Nano Lett.*, 2023, **23**, 7411-7418.
2. N. Wu, J. Wang, C. Liao, L. Han, L. Song, Y. Hu, X. Mu and Y. Kan, *J. Energy Chem.*, 2022, **64**, 372-384.
3. L. Zhang, F. Wan, X. Wang, H. Cao, X. Dai, Z. Niu, Y. Wang and J. Chen, *ACS Appl. Mater. Interfaces*, 2018, **10**, 5594-5602.
4. Q. Liang, S. Wang, X. Jia, J. Yang, Y. Li, D. Shao, L. Feng, J. Liao and H. Song, *Journal of Materials Science & Technology*, 2023, **151**, 89-98.
5. L. Jin, J. Ni, C. Shen, F. Peng, Q. Wu, D. Ye, J. Zheng, G. Li, C. Zhang, Z. Li and J. P. Zheng, *J. Power Sources*, 2020, **448**, 227336.
6. P. Cheng, P. Guo, D. Liu, Y. Wang, K. Sun, Y. Zhao and D. He, *J. Alloys Compd.*, 2019, **784**, 149-156.
7. L. Wu, C. Cai, X. Yu, Z. Chen, Y. Hu, F. Yu, S. Zhai, T. Mei, L. Yu and X. Wang, *ACS Appl. Mater. Interfaces*, 2022, **14**, 35894-35904.
8. J.-X. Lin, X.-M. Qu, X.-H. Wu, J. Peng, S.-Y. Zhou, J.-T. Li, Y. Zhou, Y.-X. Mo, M.-J. Ding, L. Huang and S.-G. Sun, *ACS Sustainable Chem. Eng.*, 2021, **9**, 1804-1813.
9. Z. Liu, C. Lu, S. Yuan, X. Ren and Y. Chen, *J. Alloys Compd.*, 2023, **960**, 170844.
10. J. Pu, T. Wang, X. Zhu, Y. Tan, L. Gao, J. Chen, J. Huang and Z. Wang, *Electrochim. Acta*, 2022, **435**, 141396.
11. H. Jia, J. Fan, P. Su, T. Guo and M.-C. Liu, *Small*, 2024, **20**, 2311343.
12. L. Tan, X. Li, Z. Wang, H. Guo, J. Wang and L. An, *ChemElectroChem*, 2018, **5**, 71-77.
13. J. Zu, W. Jing, X. Dai, Z. Feng, J. Sun, Q. Tan, Y. Chen and Y. Liu, *J. Alloys Compd.*, 2023, **933**, 167767.
14. Z. Gao, Z. Xue, Y. Miao, B. Chen, J. Xu, H. Shi, T. Tang and X. Zhao, *J. Alloys Compd.*, 2022, **906**, 164249.
15. G. Zhao, S. Liu, X. Zhang, Y. Zhang, H. Shi, Y. Liu, L. Hou and C. Yuan, *J. Mater. Chem. A*, 2023, **11**, 1856-1865.
16. N. Shi, B. Xi, J. Liu, Z. Zhang, N. Song, W. Chen, J. Feng and S. Xiong, *Adv. Funct. Mater.*, 2022, **32**, 2111586.
